# Supplementary material for: Prediction models of colorectal cancer prognosis incorporating perioperative longitudinal serum tumor markers: a retrospective longitudinal cohort study
Source: Springer Nature journal article supplement (doi:10.1186/s12916-023-02773-2), 2023-02-21
Supplement: MOESM1 [file 24050742]

Characteristics of the included and excluded patients in YNCH and SYSU6

| Variable                      | YNCH                |                     | SYSU6              |                    |
|-------------------------------|---------------------|---------------------|--------------------|--------------------|
|                               | Included (n = 1453) | Excluded (n = 1403) | Included (n = 444) | Excluded (n = 105) |
| <b>Covariate</b>              |                     |                     |                    |                    |
| Preoperative CEA              | 3.9 [2.2, 9.0]      | 3.6 [2.1, 7.8]      | 3.5 [1.9, 9.5]     | 3.5 [1.9, 10.5]    |
| Preoperative CA19-9           | 12.6 [7.5, 22.9]    | 13.2 [7.9, 23.1]    | 13.0 [6.1, 34.5]   | 3.1 [2.0, 9.2]     |
| Preoperative CA125            | 12.9 [9.0, 18.7]    | 13.1 [9.6, 18.0]    | 11.5 [7.9, 17.4]   | 11.1 [7.8, 16.7]   |
| Age                           | 58.0 [49.0, 65.0]   | 63.0 [54.0, 70.0]   | 57.0 [47.0, 63.0]  | 57.0 [47.0, 64.0]  |
| Male, n (%)                   | 861 (59.3)          | 798 (57.2)          | 259 (58.3)         | 61 (58.1)          |
| Primary site                  |                     |                     |                    |                    |
| Colon, n (%)                  | 746 (51.3)          | 636 (45.3)          | 341 (76.8)         | 52 (49.5)          |
| Rectum, n (%)                 | 707 (48.7)          | 767 (54.7)          | 103 (23.2)         | 53 (50.5)          |
| Surgical approach             |                     |                     |                    |                    |
| Laparoscopic resection, n (%) | 551 (37.9)          | 508 (36.2)          | 381 (85.8)         | 93 (88.6)          |
| Open resection, n (%)         | 902 (62.1)          | 888 (63.3)          | 63 (14.2)          | 12 (11.4)          |
| Unknown, n (%)                | 0 (0.0)             | 7 (0.5)             | 0 (0.0)            | 0 (0.0)            |
| Tumor differentiation         |                     |                     |                    |                    |
| Well, n (%)                   | 8 (0.6)             | 14 (1.0)            | 74 (16.7)          | 24 (22.9)          |
| Moderate, n (%)               | 908 (62.5)          | 868 (61.9)          | 246 (55.4)         | 36 (34.3)          |
| Poor-undifferentiated, n (%)  | 454 (31.2)          | 358 (25.5)          | 124 (27.9)         | 45 (42.9)          |
| Unknown, n (%)                | 83 (5.7)            | 163 (11.6)          | 0 (0.0)            | 0 (0.0)            |
| AJCC 8th ed. Stage            |                     |                     |                    |                    |
| I, n (%)                      | 189 (13.0)          | 465 (33.1)          | 71 (16.0)          | 24 (22.9)          |
| II, n (%)                     | 584 (40.2)          | 546 (38.9)          | 163 (36.7)         | 41 (39.0)          |
| III, n (%)                    | 680 (46.8)          | 385 (27.4)          | 210 (47.3)         | 40 (38.1)          |
| Unknown, n (%)                | 0 (0.0)             | 7 (0.5)             | 0 (0.0)            | 0 (0.0)            |
| Lymph node yield              |                     |                     |                    |                    |
| <12, n (%)                    | 287 (19.8)          | 323 (23.0)          | 36 (8.1)           | 13 (12.4)          |
| ≥12, n (%)                    | 1166 (80.2)         | 1073 (76.5)         | 408 (91.9)         | 92 (87.6)          |
| Unknown, n (%)                | 0 (0.0)             | 7 (0.5)             | 0 (0.0)            | 0 (0.0)            |
| Mucinous (colloid) type       | 98 (6.7)            | 61 (4.4)            | 29 (6.5)           | 6 (5.7)            |
| Lymphovascular invasion       | 123 (8.5)           | 83 (5.9)            | 56 (12.6)          | 6 (5.9)            |

---

|                     |          |          |           |         |
|---------------------|----------|----------|-----------|---------|
| Perineural invasion | 30 (2.1) | 29 (2.1) | 83 (18.7) | 7 (6.8) |
|---------------------|----------|----------|-----------|---------|

---

Data are median [IQR], or n (%).

YNCH, Yunnan Cancer Hospital.

SYSU6, the Sixth Affiliated Hospital of Sun Yat-sen University.
